# Supplementary material for: A global open-source database of flood-protection levees on river deltas (openDELvE)
Source: Copernicus journal article supplement (doi:10.5194/nhess-22-4087-2022), 2022-12-21
Supplement: Supplementary file 2 [file Supplementary_Material_NHESSv3.xlsx]

## Sheet: Leveed Area
PolygonID (Edmonds et al., 2020)	Delta Area(m2)	Leveed Area(m2)	Levee % of delta area	Country	UN_Region	UN_Subregion	Name	BasinID2 (Nienhuis et al., 2020)
46	19811545	1128688	0.0569712	Morocco	Africa	Northern Africa	Kenitra	102592
59	4316593811	566856616	0.13132	Senegal	Africa	Western Africa	Senegal	472622
450	327911		0	Australia	Asia-Pacific	Australia and New Zealand	Greater Bunbury
457	2845681832	15906770	0.00558979	Australia	Asia-Pacific	Australia and New Zealand	Carnarvon and Lower Gascyone River	1127577
573	216168323		0	Australia	Asia-Pacific	Australia and New Zealand	Rockhampton	1098747
666	197837	3169	0.0160182	Australia	Asia-Pacific	Australia and New Zealand	Forth	1899307
681	236827861	53100912	0.224217	New Zealand	Asia-Pacific	Australia and New Zealand	Waihao	2060487
1122	397010915		0	Mexico	Americas	Central America	Colorado River	4056471
2671	43195355	43195355	1	Russia	Europe & Central Asia	Eastern Europe	Neva	408
2698	133074976	70913080	0.532881	Netherlands	Europe & Central Asia	Western Europe	IJssel	1201795
2700	3300595920	2306822119	0.698911	Netherlands	Europe & Central Asia	Western Europe	Rhine-Meuse	1248635
2724	383448	135508	0.353393	Ireland	Europe & Central Asia	Northern Europe	An tInbhear Mór (Arklow)	1186135
2725	579617		0	Ireland	Europe & Central Asia	Northern Europe	Abhainn na Sláine (River Slaney)	1216245
2761	7750631		0	United Kingdom	Europe & Central Asia	Northern Europe	Eden	807895
2768	1413223	149819	0.106012	United Kingdom	Europe & Central Asia	Northern Europe	Ayr	694165
2860	1391775	332119	0.23863	Spain	Europe & Central Asia	Southern Europe	Guadalhorce	3149185
2861	6220833	1536527	0.246997	Spain	Europe & Central Asia	Southern Europe	Guadalfeo	3130955
2867	231013086		0	Spain	Europe & Central Asia	Southern Europe	Ebre / Ebro	2433835
2869	2744035	195002	0.071064	Spain	Europe & Central Asia	Southern Europe	Tordera
2876	1383774028	13935788	0.0100709	France	Europe & Central Asia	Western Europe	Rhone	2098785
2897	65355007	6106663	0.0934383	Italy	Europe & Central Asia	Southern Europe	Tiber	2296585
2899	13835110	1249721	0.0903297	Italy	Europe & Central Asia	Southern Europe	Volturno	2381915
2915	52620	17055	0.324116	Italy	Europe & Central Asia	Southern Europe
2916	176315	110159	0.624785	Italy	Europe & Central Asia	Southern Europe
2927	30424973	1373721	0.0451511	Italy	Europe & Central Asia	Southern Europe		2673345
2928	6526330	132877	0.0203601	Italy	Europe & Central Asia	Southern Europe
2944	3822817	1369184	0.358161	Italy	Europe & Central Asia	Southern Europe	Tronto	2171225
2952	653322171	8367366	0.0128074	Italy	Europe & Central Asia	Southern Europe	Po	1873515
2953	3614881	114274	0.0316121	Italy	Europe & Central Asia	Southern Europe	Adige	1844015
2954	2108021	376819	0.178755	Italy	Europe & Central Asia	Southern Europe	Piave	1755625
2955	30108450	38675	0.00128452	Italy	Europe & Central Asia	Southern Europe	Tagliamento	1734615
2956	49143119	2864776	0.0582945	Italy	Europe & Central Asia	Southern Europe	Isonzo	1718855
2961	15724330	5860	0.000372671	Montenegro	Europe & Central Asia	Southern Europe	Bojana-Buna	2288585
2969	46262660	7653320	0.165432	Greece	Europe & Central Asia	Southern Europe	Achelous / Evinos	2834625
2970	44214312	24271308	0.548947	Greece	Europe & Central Asia	Southern Europe	Evinos	2846015
2971	22800280	724154	0.0317608	Greece	Europe & Central Asia	Southern Europe	Mornos	2829915
2980	27037778	20753051	0.767558	Greece	Europe & Central Asia	Southern Europe	Istiaia	2716935
2985	140284217	5921357	0.0422097	Greece	Europe & Central Asia	Southern Europe	Axios	2470135
2987	224563074	39063657	0.173954	Greece	Europe & Central Asia	Southern Europe	Nestos	2412595
3157	125295784		0	Canada	Americas	Northern America		2638
3158	371640495		0	United States of America	Americas	Northern America		2738
3159	29262884		0	United States of America	Americas	Northern America		2728
3161	596613		0	United States of America	Americas	Northern America
3162	13590711		0	United States of America	Americas	Northern America		2848
3163	19451778		0	United States of America	Americas	Northern America		2798
3165	8463970		0	United States of America	Americas	Northern America		2878
3167	14816825		0	United States of America	Americas	Northern America
3168	1272123120		0	United States of America	Americas	Northern America
3170	19683722		0	United States of America	Americas	Northern America		2888
3171	5682382		0	United States of America	Americas	Northern America		2878
3172	645399697	58123	9.00574e-05	United States of America	Americas	Northern America		2908
3173	339305		0	United States of America	Americas	Northern America
3174	54521976		0	United States of America	Americas	Northern America		2948
3177	632865793		0	United States of America	Americas	Northern America	Colville	2938
3178	117273384		0	United States of America	Americas	Northern America		2928
3179	1891479		0	United States of America	Americas	Northern America		2978
3180	2075540907		0	United States of America	Americas	Northern America		3028
3181	232250681		0	United States of America	Americas	Northern America		3078
3184	51957900		0	United States of America	Americas	Northern America		2868
3185	42912448		0	United States of America	Americas	Northern America
3186	9291411		0	United States of America	Americas	Northern America
3187	16523942		0	United States of America	Americas	Northern America
3189	21513649		0	United States of America	Americas	Northern America		2288
3190	20310328		0	United States of America	Americas	Northern America		2118
3191	24471778		0	United States of America	Americas	Northern America		2098
3192	2424436		0	United States of America	Americas	Northern America
3193	191511385		0	United States of America	Americas	Northern America		2008
3194	1230326508		0	United States of America	Americas	Northern America		1968
3195	154359434		0	United States of America	Americas	Northern America		1888
3196	32001661		0	United States of America	Americas	Northern America		1868
3197	9260330		0	United States of America	Americas	Northern America		1758
3199	2803457		0	United States of America	Americas	Northern America
3202	34655498		0	United States of America	Americas	Northern America		1828
3205	3238793		0	United States of America	Americas	Northern America
3206	1250379		0	United States of America	Americas	Northern America
3207	3409745		0	United States of America	Americas	Northern America
3208	1494006		0	United States of America	Americas	Northern America
3209	1522671		0	United States of America	Americas	Northern America		1568
3214	3076523		0	United States of America	Americas	Northern America
3215	5855374		0	United States of America	Americas	Northern America
3216	86803896		0	United States of America	Americas	Northern America		1518
3217	20542830		0	United States of America	Americas	Northern America		1538
3218	7200359		0	United States of America	Americas	Northern America
3221	13877354		0	United States of America	Americas	Northern America		1448
3223	20171836		0	United States of America	Americas	Northern America		1428
3224	15273451		0	United States of America	Americas	Northern America		1328
3228	18210104405		0	United States of America	Americas	Northern America	Yukon	1258
3229	298819589		0	United States of America	Americas	Northern America		758
3234	89236788		0	United States of America	Americas	Northern America
3235	46262206		0	United States of America	Americas	Northern America
3236	432669347		0	United States of America	Americas	Northern America	Kuskokwim	638
3237	65261233		0	United States of America	Americas	Northern America		468
3238	1193219422		0	United States of America	Americas	Northern America		308
3239	46466899		0	United States of America	Americas	Northern America
3242	578006		0	United States of America	Americas	Northern America
3243	1636727		0	United States of America	Americas	Northern America
3245	34963356		0	United States of America	Americas	Northern America
3265	3053345		0	United States of America	Americas	Northern America
3269	917591		0	United States of America	Americas	Northern America
3273	26292092		0	United States of America	Americas	Northern America
3274	26071799		0	United States of America	Americas	Northern America
3275	10376070		0	United States of America	Americas	Northern America
3282	96128241	3962375	0.0412197	United States of America	Americas	Northern America		2823791
3283	2860093	582771	0.203759	United States of America	Americas	Northern America	Dungeness / Elwha	2824371
3284	886961		0	United States of America	Americas	Northern America	Hoh / Quillayute	2864471
3289	2079837		0	United States of America	Americas	Northern America		3079411
3295	113573178	8910262	0.0784539	United States of America	Americas	Northern America	Columbia	3173581
3308	47206		0	United States of America	Americas	Northern America	Sixes	3531501
3317	128562367	30701193	0.238804	United States of America	Americas	Northern America	Eel	3646801
3329	837762		0	United States of America	Americas	Northern America		3770251
3382	682671268		0	United States of America	Americas	Northern America	Lake Marion / Carolina / Sampit	4020311
3386	486523304		0	United States of America	Americas	Northern America	Lower Savannah	4053811
3387	258750648		0	United States of America	Americas	Northern America	Ogeechee	4057701
3388	689178633		0	United States of America	Americas	Northern America	Altamha	4063791
3389	200135776		0	United States of America	Americas	Northern America	Satilla	4068661
3390	207242163		0	United States of America	Americas	Northern America	St Marys	4071751
3394	5262471		0	United States of America	Americas	Northern America	Peace	4392891
3395	1686623		0	United States of America	Americas	Northern America	Myakka	4390791
3398	4659926		0	United States of America	Americas	Northern America	Withlacoochee	4277661
3400	23863037		0	United States of America	Americas	Northern America	Lower Suwannee	4242411
3404	317350971		0	United States of America	Americas	Northern America	Ochlockonee	4140911
3405	977823712		0	United States of America	Americas	Northern America	Apalachicola	4168621
3407	15877445		0	United States of America	Americas	Northern America	Lower Choctawatchee	4092141
3409	697259		0	United States of America	Americas	Northern America		4075081
3410	24909172		0	United States of America	Americas	Northern America	Escambia	4076801
3413	270574603		0	United States of America	Americas	Northern America	Mobile / Tensaw	4073471
3414	56934052		0	United States of America	Americas	Northern America	Pascagoula	4088521
3416	5092548		0	United States of America	Americas	Northern America		4097381
3418	754820017	195209	0.000258617	United States of America	Americas	Northern America	Pearl	4120201
3419	57421504194	11328093038	0.19728	United States of America	Americas	Northern America	Mississippi	4267691
3421	7689623		0	United States of America	Americas	Northern America	Sabine Lake	4177081
3423	98435978	1396783	0.0141898	United States of America	Americas	Northern America	Lower Trinity	4165211
3428	771812983	156039553	0.202173	United States of America	Americas	Northern America	Brazos	4281751
3431	82953202	5317884	0.064107	United States of America	Americas	Northern America	Colorado, TX	4301321
3434	26825709		0	United States of America	Americas	Northern America	Navidad	4289641
3438	33985281		0	United States of America	Americas	Northern America	Lower Nueces	4346011
3441	13439831901	1445986048	0.10759	Mexico	Americas	Central America	Rio Grande	224773
3509	1887391		0	Peru	Americas	South America	Canete	880904
3797	15849739	656021	0.04139	Oman	Africa	Western Asia	Qurayyat
3878	21608567		0	India	Asia-Pacific	Southern Asia	Tapti	2668546
3879	19315472		0	India	Asia-Pacific	Southern Asia	Surat	2678066
3997	188392	13566	0.0720094	India	Asia-Pacific	Southern Asia	Adyar	3358546
4027	81386798574	15679290796	0.192652	Bangladesh	Asia-Pacific	Southern Asia	Ganges-Brahmaputra	2259146
4029	29294270	6	2.04818e-07	Bangladesh	Asia-Pacific	Southern Asia	Sangu	2449116
4030	769782825	248524817	0.322851	Bangladesh	Asia-Pacific	Southern Asia		2588886
4134	3709611		0	Thailand	Asia-Pacific	South-Eastern Asia	Ban Loem	3330246
4136	19409032		0	Thailand	Asia-Pacific	South-Eastern Asia	Mae Khlong	3317996
4137	4113232160	314022366	0.0763444	Thailand	Asia-Pacific	South-Eastern Asia	Chao	3279946
4138	14402986		0	Thailand	Asia-Pacific	South-Eastern Asia	Sa Keo	3300406
4158	39486586283	8924990573	0.226026	Vietnam	Asia-Pacific	South-Eastern Asia	Mekong	4050686
4172	21957506	747579	0.0340466	Vietnam	Asia-Pacific	South-Eastern Asia	Quy Nhon	3252256
4181	675775055	3415179	0.00505372	Vietnam	Asia-Pacific	South-Eastern Asia	Hoi An	3107606
4784	414790513	51711893	0.12467	Philippines	Asia-Pacific	South-Eastern Asia	Lower Agno	3085816
Total	246885451710	41399341504	0.167686

## Sheet: Land Cover
ID	Shrubs area on delta (m2) (Map code 20)	Herbaceous vegetation area on delta (m2) (Map code 30)	Cropland area on delta (m2) (Map code 40)	Urban area on delta (m2) (Map code 50)	Bare area on delta (m2) (Map code 60)	Permanent water area on delta (m2) (Map code 80)	Wetland area on delta (m2) (Map code 90)	Forest area on delta (m2) (Map code 111-126)	Open sea area on delta (m2) (Map code 200)	Shrubs area within levees (m2) (Map code 20)	Herbaceous vegetation area within levees (m2) (Map code 30)	Cropland area within levees (m2) (Map code 40)	Urban area within levees (m2) (Map code 50)	Bare area within levees (m2) (Map code 60)	Permanent water area within levees (m2) (Map code 80)	Wetland area within levees (m2) (Map code 90)	Forest area within levees (m2) (Map code 111-126)	Open sea area within levees (m2) (Map code 200)
46	3.56488e+06	1.37802e+06	479312	689010	9.54629e+06	1.34806e+06	109842	1.81739e+06	878738	79907.1	169803	29965.2	439489	279675	89895.5	0	9988.39	29965.2
59	3.71905e+08	1.80456e+09	6.51282e+08	1.86732e+07	3.81219e+08	8.1855e+06	5.08745e+08	3.39861e+07	5.38034e+08	3.09708e+07	1.62297e+08	1.73469e+08	441278	3.5221e+07	127738	1.60265e+08	1.52125e+06	2.54316e+06
450	116356	10577.8	0	0	0	52888.9	0	42311.1	105778
457	1.74655e+09	9.57745e+08	231547	3.90322e+06	3.31223e+07	9.63677e+06	55130.3	1.75755e+07	7.68626e+07	9.69524e+06	2.18006e+06	0	1.85141e+06	175281	0	0	1.85141e+06	153371
573	3.07649e+06	2.34527e+07	6.88867e+06	55733.6	1.34095e+07	1.15814e+07	1.5728e+07	1.16338e+08	2.56375e+07
666	0	9420.81	0	0	0	9420.81	9420.81	0	169575	0	1584.5	0	0	0	0	0	0	1584.5
681	481970	7.57897e+07	1.24297e+08	1.46312e+06	77459.4	3.84715e+06	2.15165e+06	1.63956e+07	1.23247e+07	181971	1.52682e+07	3.50251e+07	95318.2	0	0	190636	2.33963e+06	0
1122	1.68672e+06	0	0	0	2.0815e+08	7.09872e+06	3.3424e+06	0	1.76733e+08
2671	0	6127	0	2.80494e+07	0	2.10769e+06	722986	716859	1.15923e+07	0	6127	0	2.80494e+07	0	2.10769e+06	722986	716859	1.15923e+07
2698	0	1.81017e+07	7.59781e+07	1.47011e+07	0	8.92463e+06	5.33102e+06	5.16767e+06	4.87068e+06	0	1.0227e+07	4.43615e+07	1.2871e+07	0	51989.1	282226	3.04507e+06	74270.1
2700	96921.3	2.78291e+08	1.34312e+09	4.82131e+08	29821.9	1.90942e+08	1.18483e+08	4.02298e+08	4.85203e+08	90640.7	2.29208e+08	1.28607e+09	4.10278e+08	0	1.47442e+07	3.51988e+07	3.3108e+08	151068
2724	0	52630.1	0	135335	0	67667.3	22555.8	7518.59	97741.6	0	45169.3	0	67754	0	0	7528.22	7528.22	7528.22
2725	0	112912	30110	0	0	225825	75274.9	135495	0
2761	104927	1.37105e+06	111922	0	0	853409	167884	6995.15	5.13444e+06
2768	0	111938	0	384788	0	412773	125931	0	377792	0	57073.9	0	78476.6	0	0	14268.5	0	0
2860	214119	155723	330912	204387	0	19465.4	447704	9732.69	9732.69	50321.1	70449.5	100642	30192.6	0	0	80513.7	0	0
2861	741040	175509	409522	1.65759e+06	0	136507	546029	2.34988e+06	204761	77309.5	0	48318.5	48318.5	0	0	338229	1.02435e+06	0
2867	3.00029e+06	3.85883e+06	1.66502e+08	1.24535e+07	0	1.50107e+07	1.47153e+07	821618	1.46506e+07
2869	301844	18293.6	265257	1.88424e+06	0	73174.3	18293.6	18293.6	164642	9285.81	0	9285.81	176430	0	0	0	0	0
2876	9.65485e+07	1.12016e+08	3.66402e+08	3.62864e+07	946294	2.47062e+08	2.9634e+08	6.39323e+07	1.6424e+08	1.18791e+06	1.40954e+06	6.26756e+06	540765	0	1.08153e+06	1.80846e+06	505305	1.13472e+06
2897	5.6621e+06	2.09943e+06	9.03391e+06	2.53749e+07	0	5.4258e+06	1.01791e+06	9.79734e+06	6.94357e+06	62862.7	26941.2	17960.8	5.37027e+06	0	0	80823.5	547804	0
2899	1.04658e+06	807890	174431	6.83034e+06	0	1.34954e+06	642639	1.14757e+06	1.83611e+06	127709	136831	36488.2	374004	0	72976.4	209807	155075	136831
2915	0	26310	0	26310	0	0	0	0	0	0	17055	0	0	0	0	0	0	0
2916	9795.28	78362.2	0	39181.1	0	29385.8	0	19590.6	0	9179.92	45899.6	0	27539.8	0	18359.8	0	9179.92	0
2927	2.46077e+06	1.44252e+06	1.68954e+07	3.23389e+06	0	1.13139e+06	235706	3.02647e+06	1.99879e+06	66317.6	28421.8	341062	871602	0	9473.94	0	56843.6	0
2928	1.77906e+06	346448	1.06743e+06	599261	0	0	205996	2.52813e+06	0	9491.21	28473.6	0	18982.4	0	0	9491.21	66438.5	0
2944	267330	160398	249508	2.40597e+06	0	311885	53466	160398	213864	61437.7	8776.82	35107.3	1.14976e+06	0	8776.82	0	78991.4	26330.5
2952	3.90033e+06	4.64243e+06	3.99171e+08	3.14615e+07	0	7.57889e+07	3.82526e+07	2.53435e+07	7.4762e+07	51597.3	77396	7.08603e+06	25798.7	0	94595.1	447177	584770	0
2953	17296.1	60536.3	1.02912e+06	207553	0	389162	216201	371866	1.32315e+06	0	0	0	0	0	0	8790.31	0	105484
2954	16931.9	8465.95	50795.7	59261.6	0	245512	8465.95	177785	1.5408e+06	0	0	0	0	0	0	0	8373.76	368445
2955	648044	588355	7.58893e+06	7.36723e+06	0	2.77124e+06	2.81387e+06	4.78359e+06	3.54719e+06	0	0	0	0	0	0	0	0	38675
2956	34044.4	136178	3.05293e+07	1.10644e+06	0	1.41284e+06	2.9874e+06	2.33204e+06	1.06048e+07	0	17205.9	309706	180662	0	103235	584999	688234	980734
2961	390159	217763	1.62415e+06	154249	0	263131	1.22492e+06	8.21149e+06	3.63846e+06	0	0	976.667	1953.33	0	0	0	2930	0
2969	3.41767e+06	3.56087e+06	1.98091e+07	9546.57	0	3.17901e+06	2.9117e+06	6.35801e+06	7.01673e+06	967334	1.07165e+06	891465	0	0	2.10537e+06	1.12856e+06	265543	1.22339e+06
2970	2.00585e+06	1.84424e+06	3.32914e+07	522853	0	3.18465e+06	1.35942e+06	1.55905e+06	446801	1.06068e+06	1.15623e+06	1.87577e+07	38222.5	0	1.74868e+06	401337	793118	315336
2971	907426	267452	1.58656e+07	3.42912e+06	0	296108	573111	1.12712e+06	334315	19839.8	39679.7	208318	327357	0	9919.92	9919.92	89279.3	19839.8
2980	1.95225e+06	227447	1.79209e+07	720249	0	492802	445417	5.0607e+06	217970	1.27871e+06	179967	1.51551e+07	303103	0	416766	397822	2.98367e+06	37887.8
2985	462709	2.73924e+06	1.08561e+08	6.19105e+06	0	2.91507e+06	7.69023e+06	508980	1.12161e+07	27843.4	324839	5.03037e+06	0	0	37124.5	408369	92811.2	0
2987	1.6577e+06	5.11124e+06	1.60686e+08	7.32151e+06	0	8.04905e+06	6.58475e+06	1.82807e+07	1.68717e+07	874422	2.94542e+06	1.96607e+07	625902	0	4.67586e+06	4.38131e+06	1.85009e+06	4.04996e+06
3157	0	7.20372e+07	0	0	0	5.04888e+06	4.78683e+07	0	341429
3158	777953	1.44478e+08	0	0	153040	3.27123e+07	1.90909e+08	0	2.61018e+06
3159	0	261955	0	0	0	7.14883e+06	2.05719e+07	0	1.2802e+06
3161	0	0	0	0	0	481552	115061	0	0
3162	0	70850.1	0	0	0	1.56287e+06	2.834e+06	0	9.12299e+06
3163	0	242624	0	0	0	4.96543e+06	5.43813e+06	0	8.80559e+06
3165	0	653315	0	0	0	728218	6.81196e+06	0	270481
3167	0	2.39252e+06	0	0	0	184686	1.22312e+07	0	8394.8
3168	0	3.2117e+08	0	0	41764.7	1.03439e+08	8.15184e+08	0	3.22883e+07
3170	0	423932	0	0	0	4.32244e+06	1.21111e+07	0	2.82621e+06
3171	0	161761	0	0	0	937386	3.88227e+06	0	700965
3172	91171.6	1.53085e+07	0	1.9146e+06	600904	1.23993e+08	4.97499e+08	0	5.99246e+06	0	0	0	0	0	0	58123	0	0
3173	0	0	0	0	0	56550.8	0	0	282754
3174	0	665955	0	0	0	1.04045e+07	3.70838e+07	0	6.36768e+06
3177	123159	1.31821e+07	0	180633	143686	1.73018e+08	4.21303e+08	0	2.49151e+07
3178	0	4.03767e+06	0	0	0	2.55184e+07	8.55483e+07	0	2.16906e+06
3179	0	8205.98	0	0	0	131296	1.69864e+06	0	53338.9
3180	52513.1	1.83392e+07	0	0	290842	4.37083e+08	1.58153e+09	0	3.82417e+07
3181	0	1.53619e+06	0	0	333780	6.20912e+07	1.47688e+08	0	2.06019e+07
3184	0	2.04371e+06	0	0	0	6.00993e+06	3.17548e+07	0	1.21494e+07
3185	0	2.5789e+06	0	186631	0	4.48763e+06	3.28598e+07	0	2.79947e+06
3186	0	302749	0	0	0	746212	6.25113e+06	0	1.99132e+06
3187	0	401564	0	0	0	786041	9.37695e+06	0	5.95938e+06
3189	18044.6	2.85555e+06	0	0	0	7.65541e+06	1.09846e+07	0	0
3190	0	60199.3	0	0	0	2.23664e+06	1.64529e+07	0	1.56055e+06
3191	13920.2	97441.7	0	0	0	1.56835e+06	2.12562e+07	0	1.53587e+06
3192	42042.2	112113	0	0	0	448451	1.82183e+06	0	0
3193	7.33346e+06	1.11914e+07	0	0	0	2.29565e+07	1.24559e+08	71709.2	2.53994e+07
3194	9.20374e+07	1.63407e+08	0	236340	0	2.11408e+08	6.56122e+08	1.01409e+08	5.70592e+06
3195	2.89728e+06	3.05797e+06	0	0	0	4.90103e+07	9.7485e+07	0	1.9088e+06
3196	557366	3.85717e+06	0	0	0	1.01608e+06	1.47431e+07	0	1.1828e+07
3197	34963.5	369614	0	0	0	804160	5.69405e+06	0	2.35754e+06
3199	0	0	0	0	0	404057	1.74094e+06	0	658463
3202	0	262167	0	0	0	5.34227e+06	2.47228e+07	0	4.32823e+06
3205	0	0	0	0	0	915419	1.95024e+06	0	373133
3206	0	5001.52	0	0	0	135041	920279	0	190058
3207	0	0	0	0	0	1.3498e+06	1.96425e+06	0	95694.5
3208	0	179880	0	0	0	169887	1.14424e+06	0	0
3209	0	36754.1	0	0	0	31503.5	1.39141e+06	0	63007.1
3214	0	0	0	0	0	794111	1.48304e+06	0	799370
3215	295140	147570	0	0	0	326763	4.57468e+06	0	511225
3216	3.55083e+06	4.47394e+06	0	136369	0	5.06662e+06	4.5694e+07	1.94325e+07	8.44961e+06
3217	94185.2	648831	0	0	0	1.58022e+06	1.69795e+07	648831	591274
3218	439238	162100	0	0	0	261451	4.78978e+06	481070	1.06672e+06
3221	57474	292595	0	0	0	862110	1.21531e+07	0	512041
3223	626224	392717	0	0	0	1.16223e+06	1.43235e+07	0	3.66712e+06
3224	842226	2.53748e+06	0	367124	0	1.19855e+06	6.67302e+06	2.26753e+06	1.38751e+06
3228	2.44888e+09	3.85733e+09	0	900251	512801	2.4006e+09	8.93253e+09	2.3247e+06	5.67021e+08
3229	253557	5.28342e+06	0	0	0	1.34621e+07	2.10051e+08	0	6.97694e+07
3234	5.76112e+06	5.54887e+06	0	0	0	6.2584e+06	6.97157e+07	0	1.95272e+06
3235	1.32836e+06	946231	0	0	0	9.73526e+06	3.42524e+07	0	0
3236	1.8836e+06	3.1527e+07	0	2.22078e+06	0	5.46941e+07	2.96202e+08	4.61423e+07	0
3237	509474	4.53068e+06	0	0	0	4.0576e+06	5.61453e+07	0	18195.5
3238	4.05007e+07	1.34495e+08	0	123215	0	6.15274e+07	8.78473e+08	0	7.80998e+07
3239	37143.8	179528	0	0	0	1.73957e+06	4.43064e+07	0	204291
3242	0	0	0	0	0	0	266272	0	311734
3243	0	0	0	0	0	151082	1.48564e+06	0	0
3245	75352.1	0	0	25117.4	0	1.0926e+06	3.06181e+07	0	3.15223e+06
3265	20677.3	592749	0	0	0	289482	268805	599641	1.28199e+06
3269	7004.51	301194	0	0	0	182117	56036.1	371239	0
3273	411672	8.23343e+06	0	0	0	2.422e+06	9.59195e+06	4.78225e+06	850788
3274	407048	8.74809e+06	0	0	0	1.50401e+06	3.71863e+06	8.58251e+06	3.11151e+06
3275	2.98902e+06	3.7756e+06	0	0	0	827623	683986	2.05196e+06	47879
3282	236428	1.24654e+07	7.22327e+06	1.29872e+07	0	187512	32610.7	6.25637e+07	432092	8169.85	253265	776135	212416	0	0	0	2.71239e+06	0
3283	0	0	57201.9	24515.1	0	57201.9	65373.6	2.44334e+06	212464	0	0	57456.3	24624.1	0	0	0	500691	0
3284	0	8212.6	0	73913.4	24637.8	385992	131402	98551.2	164252
3289	0	0	0	0	0	100233	66822.1	434343	1.47844e+06
3295	0	0	4.75454e+06	93559.9	0	4.92465e+06	323207	2.00048e+07	8.34724e+07	0	0	4.74132e+06	85429.2	0	68343.3	0	4.01517e+06	0
3308	0	0	0	0	15735.3	15735.3	15735.3	0	0
3317	1.02672e+06	1.22004e+07	5.8588e+07	1.96095e+06	776980	9.24051e+06	2.41419e+06	4.19014e+07	453238	148405	1.55825e+06	1.97656e+07	83477.6	0	213332	593618	8.33848e+06	0
3329	9413.06	65891.4	0	0	9413.06	677740	56478.3	18826.1	0
3382	590502	3.83826e+06	1.14028e+06	1.38463e+06	0	4.79223e+07	2.46728e+08	3.10115e+08	7.09519e+07
3386	814377	6.11298e+06	494811	1.92152e+07	10308.6	6.53254e+07	1.60896e+08	6.85623e+07	1.65092e+08
3387	30986.9	216908	0	227237	0	2.32918e+07	1.19754e+08	4.21938e+07	7.3036e+07
3388	394635	9.61664e+06	155777	1.09563e+07	0	3.85808e+07	3.16944e+08	1.75467e+08	1.37063e+08
3389	229406	3.26382e+06	239833	4.35871e+06	0	1.63504e+07	6.14078e+07	5.22524e+07	6.20334e+07
3390	564436	8.33066e+06	114978	1.35883e+07	0	3.84444e+07	6.2642e+07	4.1601e+07	4.19564e+07
3394	0	313371	0	345789	0	605130	842860	389012	2.76631e+06
3395	0	76170.1	0	0	0	141459	652886	130577	685531
3398	0	0	0	0	0	658122	3.23753e+06	137993	626277
3400	0	413259	0	31789.1	0	3.2213e+06	1.43899e+07	2.40538e+06	3.40144e+06
3404	537026	1.52789e+07	0	1.49525e+06	0	8.56083e+06	2.75674e+07	1.32488e+08	1.31424e+08
3405	3.19564e+06	3.61856e+07	42186.7	7.86781e+06	0	3.37282e+07	1.56207e+08	5.68581e+08	1.72016e+08
3407	0	335587	0	20974.2	0	1.01725e+06	6.68027e+06	6.44956e+06	1.37381e+06
3409	0	0	0	0	0	166510	135289	31220.6	364240
3410	0	0	0	62743.5	0	909781	1.18899e+07	8.44946e+06	3.59729e+06
3413	41829.6	1.6209e+06	115031	773847	10457.4	3.9874e+07	5.90424e+07	1.34859e+08	3.42375e+07
3414	10498.6	1.01837e+06	0	1.63779e+06	0	9.02882e+06	3.13594e+07	6.01571e+06	7.86347e+06
3416	0	31435.5	0	0	0	1.04785e+06	3.35312e+06	314355	345790
3418	787956	2.04028e+07	1.67047e+06	2.00036e+07	0	1.86798e+07	1.60859e+08	5.11604e+08	2.08125e+07	0	0	0	174661	0	0	10274.2	10274.2	0
3419	2.18717e+07	2.19244e+09	7.18548e+09	1.77508e+09	681526	4.66777e+09	9.10514e+09	2.56599e+10	6.81312e+09	6.15547e+06	7.08906e+08	3.33066e+09	9.71924e+08	83890.5	1.65464e+08	6.94184e+08	5.44696e+09	3.7541e+06
3421	0	168771	0	0	0	1.77209e+06	4.25092e+06	337542	1.1603e+06
3423	21096.4	601248	326995	221513	0	1.35123e+07	5.01884e+07	1.54742e+07	1.80902e+07	0	0	10827.8	0	0	10827.8	1.22354e+06	151589	0
3428	7.92868e+06	1.11044e+08	7.90848e+07	4.97721e+07	1.9556e+06	3.56153e+07	2.26531e+08	2.55174e+08	4.70832e+06	2.00677e+06	3.33187e+07	1.36864e+07	3.36904e+07	1.95368e+06	2.04924e+06	1.61285e+07	5.32059e+07	0
3431	415832	4.00905e+06	5.67238e+06	1.08756e+06	0	4.23296e+06	4.15512e+07	1.27415e+07	1.32427e+07	85945.6	2256072	376012	612362	0	0	988374	999118	0
3434	0	95882.2	0	0	0	2.91908e+06	1.31039e+07	351568	1.03553e+07
3438	397175	2.80169e+06	21468.9	10734.5	0	3.49943e+06	1.62734e+07	912429	1.00689e+07
3441	8.10979e+08	1.088e+09	6.59413e+09	4.93139e+08	2.10868e+07	2.89038e+08	5.78817e+08	1.32442e+09	2.24022e+09	4.59553e+07	5.43247e+07	1.18319e+09	8.40971e+07	21795.3	8.96876e+06	6.39691e+06	6.30319e+07	0
3509	990298	128156	81553.9	0	58252.8	0	34951.7	11650.6	582528
3797	1.8417e+06	479957	167427	792487	1.00791e+07	234398	0	1.23896e+06	1.01572e+06	158715	52904.9	10581	31743	328010	0	0	74066.9	0
3878	0	22626.8	848504	11313.4	113134	248894	0	0	2.03641e+07
3879	0	11322.1	871800	294374	0	362307	11322.1	0	1.77643e+07
3997	0	25118.9	25118.9	12559.5	25118.9	62797.3	0	0	37678.4	0	0	0	0	13566	0	0	0	0
4027	6.2895e+08	5.69545e+08	3.77168e+10	4.33268e+09	4.69532e+08	5.70362e+09	2.9176e+09	2.09414e+10	8.10674e+09	1.63329e+08	9.10194e+07	8.66998e+09	6.82288e+08	2.50992e+07	1.17372e+09	4.51192e+08	3.85282e+09	5.69851e+08
4029	517288	2.44025e+06	7.332e+06	1.38318e+06	1.29322e+06	5.03794e+06	1.99044e+06	2.04666e+06	7.25328e+06	0	0	0	0	0	0	0	0	6
4030	3.05062e+07	1.79992e+07	2.67913e+08	4.01035e+07	3.81525e+07	5.1573e+07	4.22463e+07	1.5676e+08	1.24529e+08	9.56255e+06	6.75468e+06	1.29681e+08	1.3656e+07	1.48513e+07	1.46596e+07	1.00474e+07	2.2136e+07	2.71766e+07
4134	47256.2	23628.1	330793	342607	35442.1	283537	472562	413492	1.76029e+06
4136	365319	494948	1.22559e+06	718853	11784.5	4.44275e+06	5.29123e+06	2.78114e+06	4.07743e+06
4137	9.39659e+06	1.7178e+07	2.19028e+09	1.36066e+09	754557	1.65519e+08	1.45795e+08	1.90596e+08	3.3059e+07	58924.9	459614	7.30668e+06	2.75167e+08	11785	5.645e+06	1.59097e+06	1.36352e+07	1.01469e+07
4138	58787.7	282181	1.26981e+06	3.44496e+06	0	4.60896e+06	2.59842e+06	2.13987e+06	0
4158	6.57065e+08	1.06182e+08	2.55401e+10	2.43791e+09	3.35249e+07	1.16408e+09	2.9842e+09	5.00736e+09	1.55615e+09	4.2943e+08	4.49693e+07	4.8584e+09	5.6208e+08	1.9223e+07	3.27425e+08	1.92018e+09	7.51264e+08	1.20189e+07
4172	129369	799738	7.27997e+06	7.06827e+06	141130	2.96373e+06	2.77556e+06	705651	94086.8	0	0	213594	415322	0	23732.7	94930.7	0	0
4181	6.14405e+06	4.01053e+07	2.80073e+08	1.47294e+08	1.85371e+06	3.23291e+07	1.54242e+07	7.11287e+07	8.14232e+07	128215	139871	1.22387e+06	885848	0	116559	652730	268086	0
4784	1.24702e+06	1.4801e+07	1.73347e+08	6.44953e+07	116544	2.4346e+07	6.91104e+07	3.03713e+07	3.6956e+07	267877	2.52736e+06	3.01886e+07	4.32097e+06	0	465873	1.12042e+07	2.737e+06	0
Total	7055.32	12459	83687.1	11519.6	1228.84	17037.2	34334	56807.3	22757	704.257	1373.59	19863.2	3094.03	97.2621	1726.33	3321.52	10573.2	645.938
fraction	0.0285773	0.0504647	0.338971	0.0466599	0.00497737	0.0690083	0.139069	0.230096	0.0921765	0.0170113	0.0331789	0.479795	0.0747363	0.00234936	0.0416995	0.0802312	0.255396	0.0156026
								0.224999	0.107604

## Sheet: Flooded Area
PolygonID	10-yr wetted area within delta polygon (m2)	10-yr wetted area that is protected (m2)	% protected of 10-yr wetted area	100-yr wetted area within delta polygon (m2)	100-yr wetted area that is protected (m2)	% protected of 100-yr wetted area	1000-yr wetted area within delta polygon (m2)	1000-yr wetted area that is protected (m2)	% protected of 1000-yr wetted area
46	660385	376229	0.569712	660385	376229	0.569712	660385	376229	0.569712
59	0	0	#DIV/0!	0	0	#DIV/0!	0	0	#DIV/0!
450	0	0	#DIV/0!	0	0	#DIV/0!	0	0	#DIV/0!
457	3.88542e+06	0	0	4.6625e+06	0	0	5.43959e+06	0	0
573	3.6291e+07	0	0	3.708e+07	0	0	3.94468e+07	0	0
666	0	0	#DIV/0!	0	0	#DIV/0!	0	0	#DIV/0!
681	3.66229e+06	0	0	3.66229e+06	0	0	3.66229e+06	0	0
1122	2.55169e+08	0	0	2.57363e+08	0	0	2.60287e+08	0	0
2671	427677	427677	1	2.13838e+06	2.13838e+06	1	3.42141e+06	3.42141e+06	1
2698	1.27794e+08	70913080	0.554901	1.27794e+08	70913080	0.554901	1.27794e+08	70913080	0.554901
2700	2.51702e+09	1.97363e+09	0.784112	2.63069e+09	2.054e+09	0.780783	2.6891e+09	2.09392e+09	0.778668
2724	0	0	#DIV/0!	0	0	#DIV/0!	0	0	#DIV/0!
2725	0	0	#DIV/0!	0	0	#DIV/0!	0	0	#DIV/0!
2761	2.58354e+06	0	0	3.61696e+06	0	0	3.61696e+06	0	0
2768	353306	16566	0.0468887	353306	16566	0.0468887	353306	16566	0.0468887
2860	0	0	#DIV/0!	0	0	#DIV/0!	0	0	#DIV/0!
2861	0	0	#DIV/0!	0	0	#DIV/0!	0	0	#DIV/0!
2867	1.65103e+08	0	0	1.67713e+08	0	0	1.69018e+08	0	0
2869	0	0	#DIV/0!	0	0	#DIV/0!	0	0	#DIV/0!
2876	3.42981e+08	4.18074e+06	0.0121894	3.76656e+08	4.18074e+06	0.0110996	3.86634e+08	4.18074e+06	0.0108132
2897	3.26775e+06	0	0	3.9213e+06	0	0	3.9213e+06	0	0
2899	1.45633e+06	624860	0.429066	1.45633e+06	624860	0.429066	1.45633e+06	624860	0.429066
2915	0	0	#DIV/0!	0	0	#DIV/0!	0	0	#DIV/0!
2916	0	0	#DIV/0!	0	0	#DIV/0!	0	0	#DIV/0!
2927	0	0	#DIV/0!	0	0	#DIV/0!	0	0	#DIV/0!
2928	0	0	#DIV/0!	0	0	#DIV/0!	0	0	#DIV/0!
2944	1.27427e+06	897.758	0.000704526	1.27427e+06	897.758	0.000704526	1.27427e+06	897.758	0.000704526
2952	5.65927e+08	8367366	0.0147852	5.72039e+08	8367366	0.0146273	5.78762e+08	8367366	0.0144574
2953	3614881	114274	0.0316121	3614881	114274	0.0316121	3614881	114274	0.0316121
2954	1.05401e+06	218992	0.20777	1.05401e+06	222985	0.211559	1.05401e+06	222992	0.211565
2955	1.94819e+07	18458.6	0.000947471	2.18434e+07	38675	0.00177056	2.24337e+07	38675	0.00172397
2956	4.04708e+07	2864776	0.0707862	4.04708e+07	2864776	0.0707862	4.04708e+07	2864776	0.0707862
2961	6289732	0	0	6.91871e+06	0	0	8.17665e+06	0	0
2969	2.44531e+07	4.87029e+06	0.199169	2.44531e+07	4.87029e+06	0.199169	2.44531e+07	4.87029e+06	0.199169
2970	7.24825e+06	5.14846e+06	0.710304	7.97307e+06	5.88395e+06	0.737978	7.97307e+06	5.88395e+06	0.737978
2971	4.14551e+06	72254.6	0.0174296	4.14551e+06	72254.6	0.0174296	4.14551e+06	72254.6	0.0174296
2980	1.35189e+06	1.29707e+06	0.959447	1.35189e+06	1.29707e+06	0.959447	1.35189e+06	1.29707e+06	0.959447
2985	5.48087e+07	5921357	0.108037	5.74187e+07	5921357	0.103126	5.93761e+07	5921357	0.0997263
2987	1.59453e+07	6.51061e+06	0.408309	1.66097e+07	7.16167e+06	0.431174	1.72741e+07	7.81273e+06	0.452281
3157	0	0	#DIV/0!	0	0	#DIV/0!	0	0	#DIV/0!
3158	1.50218e+06	0	0	1.80262e+06	0	0	1.80262e+06	0	0
3159	877887	0	0	1.46314e+06	0	0	1.46314e+06	0	0
3161	596613	0	0	596613	0	0	596613	0	0
3162	1.20806e+06	0	0	1510079	0	0	1510079	0	0
3163	0	0	#DIV/0!	313738	0	0	313738	0	0
3165	0	0	#DIV/0!	0	0	#DIV/0!	0	0	#DIV/0!
3167	0	0	#DIV/0!	0	0	#DIV/0!	284939	0	0
3168	5.29072e+06	0	0	8.23e+06	0	0	9.40572e+06	0	0
3170	5.58195e+06	0	0	6.16952e+06	0	0	6.46331e+06	0	0
3171	0	0	#DIV/0!	598145	0	0	897218	0	0
3172	3.92928e+07	0	0	4.57439e+07	0	0	4.75033e+07	0	0
3173	0	0	#DIV/0!	0	0	#DIV/0!	0	0	#DIV/0!
3174	2.04093e+06	0	0	2.33249e+06	0	0	2.62405e+06	0	0
3177	8.97477e+07	0	0	1.5344e+08	0	0	1.67046e+08	0	0
3178	290281	0	0	2.90281e+06	0	0	3.77365e+06	0	0
3179	0	0	#DIV/0!	0	0	#DIV/0!	0	0	#DIV/0!
3180	1.53892e+07	0	0	6.61164e+07	0	0	7.43809e+07	0	0
3181	1.13431e+07	0	0	4.14024e+07	0	0	4.62233e+07	0	0
3184	0	0	#DIV/0!	0	0	#DIV/0!	0	0	#DIV/0!
3185	0	0	#DIV/0!	0	0	#DIV/0!	0	0	#DIV/0!
3186	0	0	#DIV/0!	0	0	#DIV/0!	0	0	#DIV/0!
3187	0	0	#DIV/0!	0	0	#DIV/0!	0	0	#DIV/0!
3189	0	0	#DIV/0!	1.51505e+06	0	0	1.81805e+06	0	0
3190	5.66026e+06	0	0	8.98982e+06	0	0	9.98869e+06	0	0
3191	2.68184e+06	0	0	9.05121e+06	0	0	9.72167e+06	0	0
3192	909164	0	0	909164	0	0	909164	0	0
3193	2.64856e+07	0	0	6.6214e+07	0	0	8.04755e+07	0	0
3194	3.06222e+08	0	0	4.63582e+08	0	0	4.91791e+08	0	0
3195	0	0	#DIV/0!	0	0	#DIV/0!	0	0	#DIV/0!
3196	3.165e+06	0	0	3.165e+06	0	0	4.22e+06	0	0
3197	0	0	#DIV/0!	3.96871e+06	0	0	4.96089e+06	0	0
3199	0	0	#DIV/0!	0	0	#DIV/0!	0	0	#DIV/0!
3202	0	0	#DIV/0!	0	0	#DIV/0!	0	0	#DIV/0!
3205	0	0	#DIV/0!	0	0	#DIV/0!	0	0	#DIV/0!
3206	0	0	#DIV/0!	0	0	#DIV/0!	0	0	#DIV/0!
3207	0	0	#DIV/0!	0	0	#DIV/0!	0	0	#DIV/0!
3208	0	0	#DIV/0!	0	0	#DIV/0!	0	0	#DIV/0!
3209	761336	0	0	761336	0	0	761336	0	0
3214	683672	0	0	1.70918e+06	0	0	1.70918e+06	0	0
3215	1.46384e+06	0	0	1.46384e+06	0	0	1.46384e+06	0	0
3216	8.12632e+06	0	0	9.97321e+06	0	0	9.97321e+06	0	0
3217	11578686	0	0	13072710	0	0	14193228	0	0
3218	4.32022e+06	0	0	4.68023e+06	0	0	5.04025e+06	0	0
3221	1.11696e+07	0	0	1.2185e+07	0	0	1.25235e+07	0	0
3223	1.69299e+07	0	0	1.90912e+07	0	0	1.94514e+07	0	0
3224	1.14551e+07	0	0	1.14551e+07	0	0	1.14551e+07	0	0
3228	3.06182e+09	0	0	5.13104e+09	0	0	6.14253e+09	0	0
3229	1.91295e+08	0	0	2.23385e+08	0	0	2.35055e+08	0	0
3234	8.28322e+07	0	0	8.79559e+07	0	0	8.83828e+07	0	0
3235	2.69162e+07	0	0	3.82715e+07	0	0	3.95332e+07	0	0
3236	8.4153e+07	0	0	8.9079e+07	0	0	9.3184e+07	0	0
3237	3.9411e+07	0	0	5.04291e+07	0	0	5.50907e+07	0	0
3238	1.49098e+08	0	0	2.96892e+08	0	0	3.57314e+08	0	0
3239	1.77017e+06	0	0	1.77017e+06	0	0	4.86796e+06	0	0
3242	0	0	#DIV/0!	0	0	#DIV/0!	0	0	#DIV/0!
3243	0	0	#DIV/0!	0	0	#DIV/0!	0	0	#DIV/0!
3245	1.36442e+07	0	0	1.57761e+07	0	0	1.70553e+07	0	0
3265	436192	0	0	436192	0	0	436192	0	0
3269	0	0	#DIV/0!	0	0	#DIV/0!	0	0	#DIV/0!
3273	956076	0	0	1.91215e+06	0	0	1.91215e+06	0	0
3274	0	0	#DIV/0!	0	0	#DIV/0!	0	0	#DIV/0!
3275	0	0	#DIV/0!	0	0	#DIV/0!	0	0	#DIV/0!
3282	2.33038e+06	0	0	2.33038e+06	0	0	2.33038e+06	0	0
3283	0	60334.5	#DIV/0!	0	60334.5	#DIV/0!	715023	67773.8	0.0947854
3284	516775	0	0	516775	0	0	516775	0	0
3289	0	0	#DIV/0!	0	0	#DIV/0!	0	0	#DIV/0!
3295	3.36309e+07	7.33786e+06	0.218188	3.41822e+07	7.862e+06	0.230003	3.52849e+07	7.862e+06	0.222815
3308	0	0	#DIV/0!	0	0	#DIV/0!	0	0	#DIV/0!
3317	4.24191e+07	2.36655e+07	0.557898	4.37243e+07	2.49447e+07	0.570501	4.69873e+07	2.62239e+07	0.558107
3329	0	0	#DIV/0!	0	0	#DIV/0!	0	0	#DIV/0!
3382	2.25884e+08	0	0	4.48899e+08	0	0	5.37102e+08	0	0
3386	1.52449e+08	0	0	2.53109e+08	0	0	3.23133e+08	0	0
3387	1.2104e+08	0	0	172500432	0	0	2.04391e+08	0	0
3388	2.378e+08	0	0	4.6459e+08	0	0	5.41655e+08	0	0
3389	5.18871e+07	0	0	1.20081e+08	0	0	1.50472e+08	0	0
3390	0	0	#DIV/0!	1.23605e+08	0	0	1.57652e+08	0	0
3394	0	0	#DIV/0!	0	0	#DIV/0!	5262471	0	0
3395	0	0	#DIV/0!	0	0	#DIV/0!	1686623	0	0
3398	0	0	#DIV/0!	0	0	#DIV/0!	1.55331e+06	0	0
3400	0	0	#DIV/0!	5.96576e+06	0	0	23863037	0	0
3404	1.50048e+06	0	0	1.42545e+07	0	0	1.01282e+08	0	0
3405	2.1597e+07	0	0	5.28755e+07	0	0	1.13198e+08	0	0
3407	0	0	#DIV/0!	0	0	#DIV/0!	0	0	#DIV/0!
3409	0	0	#DIV/0!	0	0	#DIV/0!	0	0	#DIV/0!
3410	0	0	#DIV/0!	0	0	#DIV/0!	0	0	#DIV/0!
3413	4.37367e+07	0	0	7.78365e+07	0	0	1.80877e+08	0	0
3414	3.57663e+07	0	0	4.30655e+07	0	0	5.40144e+07	0	0
3416	3395032	0	0	5092548	0	0	5092548	0	0
3418	1.10371e+08	0	0	2.41483e+08	1567.81	6.4924e-06	3.46669e+08	195209	0.000563099
3419	6.53307e+09	5.24716e+08	0.0803169	1.66161e+10	2.15074e+09	0.129438	2.28443e+10	3.8746e+09	0.169609
3421	6.99057e+06	0	0	7689623	0	0	7689623	0	0
3423	3.73904e+07	109260	0.00292213	8.31746e+07	1396783	0.0167934	8.47007e+07	1396783	0.0164908
3428	6.00633e+06	0	0	1.65925e+08	1.3836e+07	0.0833873	5.0303e+08	9.30088e+07	0.184897
3431	0	0	#DIV/0!	3.19636e+07	0	0	8.21922e+07	5317884	0.0647006
3434	0	0	#DIV/0!	0	0	#DIV/0!	2.24756e+07	0	0
3438	0	0	#DIV/0!	0	0	#DIV/0!	0	0	#DIV/0!
3441	770103	0	0	3.85051e+06	0	0	3.41849e+09	3.80318e+07	0.0111253
3509	0	0	#DIV/0!	0	0	#DIV/0!	0	0	#DIV/0!
3797	0	0	#DIV/0!	0	0	#DIV/0!	0	0	#DIV/0!
3878	4.98659e+06	0	0	6.64879e+06	0	0	7.47989e+06	0	0
3879	4.02406e+06	0	0	4828868	0	0	6.43849e+06	0	0
3997	142406	13196.5	0.0926682	184770	13196.5	0.071421	184770	13196.5	0.071421
4027	9.22277e+09	2.34305e+09	0.25405	2.48453e+10	7.11287e+09	0.286287	4.18051e+10	1.21537e+10	0.290722
4029	7.53281e+06	0	0	1.84135e+07	6	3.25847e-07	2.84573e+07	6	2.10842e-07
4030	2.84519e+07	6.29177e+06	0.221137	4.50489e+08	1.69878e+08	0.377096	5.84845e+08	2.36728e+08	0.40477
4134	1.85481e+06	0	0	1.85481e+06	0	0	1.85481e+06	0	0
4136	5.29337e+06	0	0	7.05783e+06	0	0	7.94006e+06	0	0
4137	3.1685e+08	9.06626e+06	0.0286137	3.35978e+08	9.06626e+06	0.0269847	3.53442e+08	1.07147e+07	0.0303152
4138	1.18613e+07	0	0	1.18613e+07	0	0	1.18613e+07	0	0
4158	6.53914e+09	3.20622e+09	0.490312	7.20004e+09	3.39165e+09	0.471059	1.07226e+10	4.08532e+09	0.381
4172	0	0	#DIV/0!	0	0	#DIV/0!	0	0	#DIV/0!
4181	2.47235e+06	0	0	2.47235e+06	0	0	3.29646e+06	0	0
4784	3.31832e+06	0	0	3.31832e+06	0	0	3.31832e+06	0	0
Total	3.22611e+10	8.2061e+09	0.254365	6.31795e+10	1.50514e+10	0.238232	9.58787e+10	2.27441e+10	0.237217

## Sheet: Population
PolygonID	Total Delta Population	Population within Leveed Area	% population in leveed area	UN_Region
4027	105920785	25055452	0.236549	Asia-Pacific
4137	8061490	4257058	0.528073	Asia-Pacific
4158	17924880	3114876	0.173774	Asia-Pacific
2700	2075317	1911161	0.920901	Europe & Central Asia
3419	3135362	1776650	0.566649	Americas
2671	531676	531676	1	Europe & Central Asia
4030	1100797	328345	0.298279	Asia-Pacific
3441	1576180	201403	0.127779	Americas
3428	89314	63283	0.708545	Americas
2698	43279	38710	0.894429	Europe & Central Asia
4784	536653	34562	0.0644029	Asia-Pacific
2897	78510	29939	0.38134	Europe & Central Asia
59	391668	8988	0.022948	Africa
4181	1221553	7033	0.00575743	Asia-Pacific
2944	1876	1781	0.94936	Europe & Central Asia
457	5668	1553	0.273994	Asia-Pacific
2987	9894	1429	0.144431	Europe & Central Asia
46	3974	930.699	0.234197	Africa
2861	3232	909	0.28125	Europe & Central Asia
2876	101691	898	0.00883067	Europe & Central Asia
2980	1313	721	0.549124	Europe & Central Asia
4172	28307	715.285	0.0252688	Asia-Pacific
2970	2252	580	0.257549	Europe & Central Asia
2768	515.39	515.39	1	Europe & Central Asia
681	2121	443	0.208864	Asia-Pacific
3431	510	380	0.745098	Americas
2927	1666	323.579	0.194225	Europe & Central Asia
2971	1912	246.394	0.128867	Europe & Central Asia
2899	12632	207	0.016387	Europe & Central Asia
2954	1083	193.219	0.178411	Europe & Central Asia
2860	700.446	179.569	0.256364	Europe & Central Asia
3282	19703	163	0.00827285	Americas
2869	2528	156.323	0.0618366	Europe & Central Asia
2956	2448	153	0.0625	Europe & Central Asia
3317	2142	132	0.0616246	Americas
3797	4798	128	0.0266778	Africa
2928	443	98.2126	0.221699	Europe & Central Asia
3418	32161	96.8852	0.00301251	Americas
2724	274.419	87.7722	0.319847	Europe & Central Asia
3283	98	83	0.846939	Americas
3295	196	51	0.260204	Americas
2952	51407	38	0.000739199	Europe & Central Asia
2985	8917	27	0.00302792	Europe & Central Asia
2915	68.9063	17.3126	0.251249	Europe & Central Asia
2953	2302	15.6917	0.00681656	Europe & Central Asia
2969	290	15	0.0517241	Europe & Central Asia
3997	201.119	8.95295	0.0445156	Asia-Pacific
2916	11.1157	6.95948	0.626095	Europe & Central Asia
2955	7624	1.4522	0.000190478	Europe & Central Asia
2961	521	0.155582	0.000298622	Europe & Central Asia
3172	437	0.124032	0.000283825	Americas
666	4.53187	0.0293852	0.00648413	Asia-Pacific
4029	26945	3.06568e-05	1.13776e-09	Asia-Pacific
3423	67	0	0	Americas
450	3.35838		0	Asia-Pacific
573	339		0	Asia-Pacific
1122	72		0	Americas
2725	0.646048		0	Europe & Central Asia
2761	0			Europe & Central Asia
2867	28904		0	Europe & Central Asia
3157	0			Americas
3158	0			Americas
3159	0			Americas
3161	0			Americas
3162	0			Americas
3163	0			Americas
3165	0			Americas
3167	0			Americas
3168	0			Americas
3170	0			Americas
3171	0			Americas
3173	0.00338563		0	Americas
3174	0			Americas
3177	4		0	Americas
3178	0			Americas
3179	0			Americas
3180	0			Americas
3181	0			Americas
3184	0			Americas
3185	155		0	Americas
3186	0			Americas
3187	0			Americas
3189	0			Americas
3190	0			Americas
3191	0			Americas
3192	0			Americas
3193	0			Americas
3194	710		0	Americas
3195	814		0	Americas
3196	0			Americas
3197	0			Americas
3199	0			Americas
3202	4		0	Americas
3205	0			Americas
3206	0			Americas
3207	0			Americas
3208	0			Americas
3209	0			Americas
3214	0			Americas
3215	0			Americas
3216	158		0	Americas
3217	0			Americas
3218	0			Americas
3221	0			Americas
3223	35		0	Americas
3224	618		0	Americas
3228	3980		0	Americas
3229	0			Americas
3234	1		0	Americas
3235	0			Americas
3236	5641		0	Americas
3237	0			Americas
3238	514		0	Americas
3239	0			Americas
3242	0			Americas
3243	0			Americas
3245	4		0	Americas
3265	0			Americas
3269	0			Americas
3273	0			Americas
3274	0			Americas
3275	0			Americas
3284	0.707906		0	Americas
3289	1.10507		0	Americas
3308	0			Americas
3329	0			Americas
3382	2437		0	Americas
3386	40745		0	Americas
3387	325		0	Americas
3388	24263		0	Americas
3389	403		0	Americas
3390	30979		0	Americas
3394	527		0	Americas
3395	3		0	Americas
3398	1		0	Americas
3400	36		0	Americas
3404	1917		0	Americas
3405	10501		0	Americas
3407	59		0	Americas
3409	19		0	Americas
3410	218		0	Americas
3413	1105		0	Americas
3414	1840		0	Americas
3416	46		0	Americas
3421	0			Americas
3434	3		0	Americas
3438	0			Americas
3509	899		0	Americas
3878	14		0	Asia-Pacific
3879	276		0	Asia-Pacific
4134	1603		0	Asia-Pacific
4136	872		0	Asia-Pacific
4138	23824		0	Asia-Pacific
Total	1.43215e+08	3.73724e+07	0.260953
