# Supplementary material for: A global open-source database of flood-protection levees on river deltas (openDELvE)
Source: Copernicus journal article supplement (doi:10.5194/nhess-22-4087-2022), 2022-12-21
Supplement: Supplementary file [file nhess-22-4087-2022-supplement-title-page.pdf › nhess-22-4087-2022-supplement-title-page.pdf]

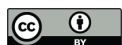

*Supplement of*

**A global open-source database of flood-protection levees on river deltas (openDELvE)**

**Jaap H. Nienhuis et al.**

*Correspondence to:* Jaap H. Nienhuis ([j.h.nienhuis@uu.nl](mailto:j.h.nienhuis@uu.nl))

- [nhess-22-4087-2022-supplement-title-page.pdf](#)
- [Supplement\\_v2.docx](#)
- [Supplementary\\_Material\\_NHESSv3.xlsx](#)

The copyright of individual parts of the supplement might differ from the article licence.
